# Supplementary material for: Statistical and Machine Learning forecasting methods: Concerns and ways forward
Source: PubMed Central journal article supplement (PMC5870978; doi:10.1371/journal.pone.0194889), 2018-03-27
Supplement: pone.0194889.s001.pdf [file pone.0194889.s001.pdf]

**Table A1. The sMAPE for each of the 18 forecasting horizon and their overall average.**

| Model         | 1     | 2    | 3     | 4     | 5     | 6     | 7     | 8     | 9     | 10    | 11    | 12    | 13    | 14    | 15    | 16    | 17    | 18    | Mean  |
|---------------|-------|------|-------|-------|-------|-------|-------|-------|-------|-------|-------|-------|-------|-------|-------|-------|-------|-------|-------|
| MLP Iterative | 7.98  | 8.62 | 9.47  | 9.81  | 10.75 | 10.56 | 12.07 | 11.52 | 12.03 | 12.86 | 12.35 | 13.23 | 13.44 | 13.65 | 14.49 | 15.53 | 15.71 | 17.20 | 12.29 |
| MLP Direct    | 8.92  | 9.88 | 10.82 | 11.07 | 11.82 | 11.83 | 13.18 | 12.81 | 13.28 | 14.10 | 13.59 | 14.37 | 14.51 | 14.93 | 16.06 | 16.73 | 16.76 | 18.21 | 13.49 |
| MLP Multi     | 7.87  | 8.33 | 9.39  | 9.77  | 10.88 | 10.92 | 12.30 | 11.65 | 12.25 | 13.34 | 12.86 | 13.77 | 14.02 | 14.52 | 16.01 | 16.69 | 16.83 | 18.38 | 12.77 |
| BNN Iterative | 7.92  | 8.37 | 9.46  | 9.67  | 10.54 | 10.39 | 11.86 | 11.28 | 11.73 | 12.53 | 12.04 | 13.03 | 13.28 | 13.54 | 14.33 | 15.28 | 15.55 | 16.82 | 12.09 |
| BNN Multi     | 7.95  | 8.19 | 9.34  | 9.75  | 10.74 | 10.90 | 12.36 | 11.63 | 12.38 | 13.20 | 12.86 | 13.79 | 13.93 | 14.64 | 15.77 | 16.46 | 16.68 | 18.25 | 12.71 |
| Naïve2        | 10.75 | 9.07 | 11.50 | 11.92 | 10.38 | 11.07 | 11.31 | 12.59 | 13.24 | 12.28 | 12.98 | 12.38 | 12.89 | 14.02 | 15.87 | 16.01 | 15.18 | 16.49 | 12.77 |
| SES           | 8.57  | 7.58 | 9.43  | 9.83  | 9.62  | 9.98  | 10.54 | 10.34 | 11.24 | 10.80 | 10.87 | 11.29 | 11.29 | 12.78 | 14.12 | 14.92 | 14.06 | 15.46 | 11.26 |
| Holt          | 7.97  | 7.75 | 8.92  | 9.51  | 10.16 | 10.08 | 11.11 | 10.45 | 11.33 | 11.67 | 11.02 | 11.53 | 12.34 | 12.72 | 14.14 | 15.21 | 15.21 | 16.12 | 11.51 |
| Damped        | 8.14  | 7.44 | 9.00  | 9.52  | 9.72  | 9.97  | 10.60 | 10.10 | 10.83 | 10.72 | 10.62 | 10.93 | 11.27 | 12.25 | 13.67 | 14.46 | 13.93 | 15.19 | 11.02 |
| Comb          | 8.18  | 7.50 | 9.00  | 9.50  | 9.70  | 9.84  | 10.54 | 10.00 | 10.87 | 10.75 | 10.47 | 10.82 | 11.18 | 12.15 | 13.53 | 14.51 | 13.96 | 14.99 | 10.97 |
| Theta         | 8.20  | 7.59 | 9.02  | 9.44  | 9.68  | 9.82  | 10.54 | 9.98  | 10.73 | 10.77 | 10.25 | 10.91 | 11.06 | 12.04 | 13.21 | 14.14 | 13.81 | 14.86 | 10.89 |
| ARIMA         | 7.78  | 7.56 | 9.00  | 9.31  | 9.84  | 10.11 | 10.88 | 10.62 | 11.27 | 11.40 | 10.88 | 11.41 | 11.85 | 12.38 | 13.71 | 14.34 | 14.72 | 16.03 | 11.28 |
| ETS           | 8.06  | 7.57 | 9.17  | 9.60  | 9.94  | 10.08 | 10.91 | 10.66 | 11.09 | 11.21 | 10.82 | 11.16 | 11.80 | 12.37 | 13.83 | 14.65 | 14.35 | 15.45 | 11.26 |

**Table A2. The MASE for each of the 18 forecasting horizon and their overall average.**

| Model         | 1    | 2    | 3    | 4    | 5    | 6    | 7    | 8    | 9    | 10   | 11   | 12   | 13   | 14   | 15   | 16   | 17   | 18   | Mean |
|---------------|------|------|------|------|------|------|------|------|------|------|------|------|------|------|------|------|------|------|------|
| MLP Iterative | 0.51 | 0.54 | 0.61 | 0.72 | 0.76 | 0.81 | 0.90 | 0.91 | 0.97 | 1.05 | 1.02 | 1.05 | 1.10 | 1.14 | 1.20 | 1.29 | 1.28 | 1.43 | 0.96 |
| MLP Direct    | 0.61 | 0.65 | 0.72 | 0.82 | 0.85 | 0.91 | 1.01 | 1.03 | 1.08 | 1.18 | 1.14 | 1.18 | 1.23 | 1.29 | 1.35 | 1.42 | 1.42 | 1.56 | 1.08 |
| MLP Multi     | 0.50 | 0.53 | 0.61 | 0.71 | 0.76 | 0.81 | 0.93 | 0.91 | 0.98 | 1.11 | 1.07 | 1.12 | 1.18 | 1.24 | 1.33 | 1.42 | 1.43 | 1.62 | 1.01 |
| BNN Iterative | 0.50 | 0.53 | 0.60 | 0.70 | 0.73 | 0.78 | 0.87 | 0.88 | 0.93 | 1.00 | 0.97 | 1.01 | 1.06 | 1.09 | 1.15 | 1.24 | 1.30 | 1.37 | 0.93 |
| BNN Multi     | 0.50 | 0.52 | 0.60 | 0.71 | 0.75 | 0.81 | 0.91 | 0.93 | 1.00 | 1.09 | 1.08 | 1.11 | 1.19 | 1.26 | 1.32 | 1.40 | 1.41 | 1.55 | 1.01 |
| Naïve2        | 0.66 | 0.59 | 0.72 | 0.87 | 0.82 | 0.91 | 0.96 | 1.03 | 1.07 | 1.11 | 1.08 | 1.04 | 1.16 | 1.19 | 1.36 | 1.45 | 1.42 | 1.55 | 1.05 |
| SES           | 0.53 | 0.51 | 0.62 | 0.76 | 0.76 | 0.84 | 0.90 | 0.92 | 0.96 | 1.02 | 0.96 | 1.01 | 1.08 | 1.13 | 1.27 | 1.39 | 1.37 | 1.50 | 0.97 |
| Holt          | 0.51 | 0.50 | 0.58 | 0.72 | 0.74 | 0.80 | 0.86 | 0.88 | 0.92 | 1.00 | 0.92 | 0.95 | 1.06 | 1.07 | 1.21 | 1.33 | 1.34 | 1.47 | 0.94 |
| Damped        | 0.51 | 0.49 | 0.59 | 0.73 | 0.73 | 0.81 | 0.87 | 0.86 | 0.90 | 0.97 | 0.91 | 1.02 | 1.04 | 1.18 | 1.30 | 1.30 | 1.42 | 1.42 | 0.92 |
| Comb          | 0.51 | 0.49 | 0.59 | 0.72 | 0.73 | 0.80 | 0.85 | 0.86 | 0.90 | 0.96 | 0.89 | 0.92 | 1.01 | 1.03 | 1.17 | 1.29 | 1.28 | 1.40 | 0.91 |
| Theta         | 0.51 | 0.50 | 0.59 | 0.72 | 0.72 | 0.80 | 0.85 | 0.85 | 0.88 | 0.95 | 0.87 | 0.91 | 0.99 | 1.02 | 1.14 | 1.25 | 1.24 | 1.36 | 0.90 |
| ARIMA         | 0.48 | 0.48 | 0.56 | 0.68 | 0.70 | 0.78 | 0.84 | 0.85 | 0.90 | 0.96 | 0.89 | 0.92 | 0.99 | 1.03 | 1.14 | 1.23 | 1.25 | 1.40 | 0.89 |
| ETS           | 0.51 | 0.49 | 0.60 | 0.73 | 0.74 | 0.81 | 0.87 | 0.90 | 0.92 | 0.98 | 0.91 | 0.95 | 1.03 | 1.04 | 1.19 | 1.29 | 1.30 | 1.42 | 0.92 |
